1 Short Title: Psittacid adenovirus-2 infection in the orange-bellied parrot

2

3

4 **Psittacid Adenovirus-2 infection in the critically**  
5 **endangered orange-bellied parrot (*Neophema***  
6 ***chrysogastor*): A key threatening process or an**  
7 **example of a host-adapted virus?**

8

9 Nian Yang<sup>1</sup>, Jennifer McLelland<sup>2</sup>, David J. McLelland<sup>2</sup>, Judy Clarke<sup>3</sup>, Lucy Woolford<sup>4</sup>, Paul Eden<sup>5</sup>,

10 David N. Phalen<sup>1\*</sup>

11

12 <sup>1</sup> Sydney School of Veterinary Science, University of Sydney, Camden, New South Wales,

13 Australia

14 <sup>2</sup> Adelaide Zoo, Zoos South Australia, Adelaide, South Australia, Australia

15 <sup>3</sup>Department of Primary Industries, Parks, Water and Environment, Hobart, Tasmania,

16 Australia

17 <sup>4</sup>School of Animal and Veterinary Science, University of Adelaide, Roseworthy, South

18 Australia, Australia

19 <sup>5</sup> Werribee Open Range Zoo, Zoos Victoria, Werribee, Victoria, Australia

20

21 \*Corresponding author

22 Email: david.phalen@sydney.edu.au (DP)

## 23 **Abstract**

24 Psittacid Adenovirus-2 (PsAdv-2) was identified in captive orange-bellied parrots (  
25 *Neophema chrysogastor*) during a multifactorial cluster of mortalities at the Adelaide Zoo,  
26 South Australia, and an outbreak of *Pseudomonas aeruginosa* septicaemia at the Tasmanian  
27 Department of Primary Industries, Parks, Water and Environment captive breeding facility,  
28 Tarooma, Tasmania. This was the first time that an adenovirus had been identified in orange-  
29 bellied parrots and is the first report of PsAdv-2 in Australia. To investigate the status of  
30 PsAdv-2 in the captive population of orange-bellied parrots, 102 healthy birds from five  
31 breeding facilities were examined for the presence of PsAdv-2 DNA in droppings and/or  
32 cloacal swabs using a nested polymerase chain reaction assay. Additionally, eight birds  
33 released to the wild for the 2016 breeding season were similarly tested when they were  
34 recaptured prior to migration to be held in captivity for the winter. PsAdv-2 was identified in  
35 all breeding facilities as well as the birds recaptured from the wild. Prevalence of shedding  
36 ranged from 29.7 to 76.5%, demonstrating that PsAdv-2 is endemic in the captive  
37 population of orange-bellied parrots and that wild parrots may have been exposed to the  
38 virus. PsAdv-2 DNA was detected in both cloacal swabs and faeces of the orange-bellied  
39 parrots, but testing both samples from the same birds suggested that testing faeces would  
40 be more sensitive than cloacal swabs. PsAdv-2 was not found in other psittacine species  
41 housed in nearby aviaries at the Adelaide Zoo. The source of the infection in the orange-  
42 bellied parrots remains undetermined. In this study, PsAdv-2 prevalence of shedding was  
43 higher in adult birds as compared to birds less than one year old. Preliminary data also  
44 suggested a correlation between adenovirus shedding prevalence within the breeding  
45 collection and chick survival.

46 **Key words:** Disease, *Neophema chrysogastor*, orange-bellied parrots, prevalence, Psittacid

47 Adenovirus-2, subclinical infection

48

## 49 Introduction

50

51 The orange-bellied parrot (*Neophema chrysogaster*) is the most critically endangered parrot  
52 in the world [1]. It is a migratory species that breeds in south-western Tasmania and  
53 historically wintered along the coast of South Australia, Victoria, and New South Wales. It  
54 was abundant before the 1920s [2], but declined to around 200 birds in the 1990s [3]. In the  
55 spring of 2016, just 13 birds returned to the only known remaining breeding site, in  
56 Melaleuca, Tasmania [4]. While many possible causes have been suggested, the threatening  
57 processes driving this decline are incompletely understood (reviewed in Stojanovic et al. [5]).  
58 To save this species, a captive breeding program was initiated in 1984 [6]. Currently, there  
59 are over 400 birds managed in six captive breeding institutions. The wild population is  
60 augmented annually with the release of captive bred birds to the breeding ground each  
61 spring [4].

62 Captive breeding programs are increasingly the last resort for the survival of many  
63 endangered species [7, 8, 9]. A potential risk of captive breeding and release programs is the  
64 introduction of disease to both the captive and wild populations from other species in the  
65 captive collection or from native wild or feral species frequenting the breeding facilities [10,  
66 11]. If an infectious disease is introduced into a captive population of endangered species it  
67 can prove challenging or even impossible to eradicate [12, 13]. The introduction of novel  
68 pathogens to wild populations can also threaten their viability [14,15,16].

69 Endangered psittacine birds (parrots) in captive breeding programs are particularly  
70 at risk for exposure to introduced viruses, as multiple viruses have been established in  
71 parrots as the result of the historic and ongoing trade in wild-caught parrots [17]. Notable

72 examples of virus incursions in captive breeding programs for endangered parrots, include  
73 Avian Bornavirus in the main breeding colony of Spix macaws (*Cyanopsitta spixii*) [11] and  
74 Psittacine Beak and Feather Disease Virus (PBFDV) in captive and wild populations of Echo  
75 parrots (*Psittacula eques*) [18]. The orange-bellied parrot population is also threatened by  
76 PBFDV with three incursions of PBFDV occurring in the captive or wild populations in the  
77 past 15 years [19].

78           Adenoviruses also have the potential to impact captive breeding programs of  
79 endangered parrots. Adenovirus infections have been described and variably characterised  
80 in many species of parrots originating from all of their geographic distributions [20, 21, 22,  
81 23, 24]. They have been associated with a range of lesions, including hepatitis, splenitis,  
82 pancreatitis, enteritis, nephritis, conjunctivitis and pneumonia [21, 25, 26, 27]. At least one  
83 adenovirus has been shown to cause significant ongoing mortality events in captive-raised  
84 *Poicephalis* species in South Africa, and *Poicephalis* and other species in Europe [28, 29]. In  
85 contrast, many reports describe adenovirus-associated disease where only one or a few  
86 birds are affected [24, 25, 30]. In some of these reports, adenovirus-associated lesions were  
87 part of a multifactorial disease complex [20, 21, 31, 32], or were incidental findings [29, 33,  
88 34]. This suggests that, in at least some instances, adenovirus-associated lesions in parrots  
89 reflect reactivation of subclinical infections in the face of immune suppression, a  
90 phenomenon recognised in other species, including chickens [35].

91           Overall, the epizootiology of adenoviruses that affect parrots is poorly understood.  
92 It is likely, however, based on the behaviour of adenoviruses in poultry, that the  
93 adenoviruses that affect parrots are maintained in subclinically infected individuals, and that  
94 disease may only occur when birds are stressed or co-infected with immunosuppressive

95 viruses [36, 37, 38]. It is also possible that given that many species of parrots from multiple  
96 geographic origins are commonly housed together, that some species are more likely to be  
97 subclinically infected while other species are more prone to infection resulting in disease.  
98 Evidence for this was provided in a recent report where it was shown that a novel  
99 adenovirus shed by subclinically-infected purple-crowned lorikeets (*Glossopsitta*  
100 *porphyrocephala*) was found to be fatal to in-contact red-bellied parrots (*Poicephalus*  
101 *rufiventris*) [24]. Evidence for widespread subclinical infection of parrots by Psittacid  
102 Adenovirus 2 (PsAdv-2) in parrots was also demonstrated by a study of avicultural birds in  
103 Slovenia [34] where PsAdv-2 DNA was found in cloacal swabs of 10.2% (13/128 birds) birds  
104 tested, yet there was no history of adenovirus disease in these collections.

105 In the current study, we report, for the first time, the presence of PsAdv-2 in  
106 Australia. We demonstrate that it is widespread in the captive breeding population of  
107 orange-bellied parrots and that the wild population has been exposed. We also provide  
108 preliminary data indicating that subclinical infection may result in reduced chick survivability  
109 and that PsAdv-2 disease is most likely to occur in birds with other concurrent diseases.

110

## 111 **Materials and methods**

112

### 113 **Animal ethics**

114

115 All the material used in this study was submitted for diagnostic purposes. The Animal Ethics  
116 Committee at the University of Sydney was informed that findings from the diagnostic

117 material were to be used in a publication and a formal waiver of ethics approval has been  
118 granted.

119

## 120 **Investigation of mortality events at two captive breeding facilities**

121

122 The first mortality event (n = 8) occurred between February- and March 2016 in the captive  
123 breeding collection at the Adelaide Zoo, South Australia (34°54'46.71"S, 138°36'25.00"E).

124 The second mortality event (n=25) occurred in January 2017 at the Department of Primary  
125 Industries, Parks, Water and Environment orange-bellied parrot breeding facility in Tarooma,  
126 Tasmania (42°57'0.70"S, 147°21'13.71"E) [39]. Representative tissues from deceased birds  
127 were collected into 10% neutral buffered formalin, embedded in paraffin, sectioned at 4 µm  
128 and stained with haematoxylin and eosin. Liver, kidney and/or spleen were frozen at -20°C  
129 from all eight birds from the Adelaide mortality event, and 15 of the 25 birds that died at the  
130 Tarooma facility.

131

## 132 **Detection of adenovirus DNA in tissues**

133

134 Tissues from two birds from the Adelaide Zoo and 15 birds from the Tarooma breeding  
135 facility were submitted for PCR screening for adenovirus infection (Table 1). DNA was

136 extracted from all tissues submitted with a DNA extraction kit (DNeasy Blood & Tissue Kit,  
137 Qiagen, Doncaster, Victoria, Australia) following the manufacture's recommendations.

138 Adenovirus DNA was detected using nested-PCR with degenerated primer sets described by  
139 Wellehan et al. [40]. The first and nested rounds of the DNA amplifications were based on

140 the following protocol: One cycle of 95 C° for 3 min, followed by six cycles where the first  
 141 annealing temperature (60<sup>0</sup>C) was decreased by 2<sup>0</sup>C with each cycle. In all subsequent  
 142 cycles (n=44) the annealing temperature was 50<sup>0</sup>C. Primers were allowed to anneal in all  
 143 cycles for 30 s and all extension phases were at 72<sup>0</sup>C for 30 s., these were followed by a  
 144 denaturation phase at 95<sup>0</sup>C for 30 s. Following the last standard cycle, the samples were  
 145 held at 72<sup>0</sup>C for 2 min and immediately chilled to 5<sup>0</sup>C. The amplification products were  
 146 separated by electrophoresis on 1.5% agarose gels containing ethidium bromide and  
 147 visualized under ultraviolet light. The second amplification products of the positive samples  
 148 were purified by centrifugation (Amicon Ultra Centrifugal Filtration Units, Millipore,  
 149 Tulagreen, Ireland) and sequenced in both directions using the amplification primers  
 150 (Australian Genome Research Facility, Sydney, New South Wales, Australia). Sequences  
 151 were compared with adenovirus sequences in GenBank using NCBI BLAST [41].

152

153 **Table 1. Histopathological findings and PCR results of orange-bellied parrots (*Neophema***  
 154 ***chrysogaster*) necropsied at Adelaide Zoo and Tarooma Breeding Facility.**

155

| Facility                  | Bird No. | Viral inclusions observed | Fresh tissue tested |       |                         | Results for Adenovirus Testing |
|---------------------------|----------|---------------------------|---------------------|-------|-------------------------|--------------------------------|
|                           |          |                           | Kidney              | Liver | Pooled Liver and Spleen |                                |
| Adelaide Zoo              | 1        | Kidney                    | ✓                   |       |                         | +                              |
|                           | 2        | Kidney                    | ✓                   |       |                         | +                              |
|                           | 3        | Kidney                    |                     |       | ✓                       | -                              |
|                           | 4        | Kidney                    |                     |       | ✓                       | -                              |
|                           | 5        | Kidney                    | ✓                   |       |                         | +                              |
|                           | 6        | no                        | ✓                   |       |                         | +                              |
|                           | 7        | no                        | ✓                   |       |                         | -                              |
|                           | 8        | NA                        | ✓                   |       |                         | +                              |
| Tarooma Breeding Facility | 9        | NA                        | ✓                   |       |                         | -                              |
|                           | 10       | NA                        |                     | ✓     |                         | +                              |
|                           | 11       | NA                        |                     | ✓     |                         | +                              |
|                           | 12       | NA                        |                     | ✓     |                         | +                              |
|                           | 13       | NA                        |                     | ✓     |                         | +                              |
|                           | 14       | NA                        |                     | ✓     |                         | -                              |
|                           | 15       | NA                        |                     | ✓     |                         | -                              |
|                           | 16       | NA                        |                     | ✓     |                         | -                              |
|                           | 17       | NA                        |                     |       | ✓                       | +                              |



## 156 **Detection of adenovirus DNA in cloacal swabs and droppings**

157

158 Cloacal swabs, frozen dry at -20°C prior to analysis, were obtained from 102 outwardly  
159 healthy captive orange-bellied parrots at Adelaide Zoo (n = 23), Priam Parrot Breeding  
160 Centre (n = 17) (35°20'22.71"S, 149°15'0.65"E), Healesville Sanctuary (n = 37) (37°40'57.13"S,  
161 145°31'51.20"E), and Moonlit Sanctuary (n = 25) 38°12'41.70"S, 145°15'2.89"E). This  
162 sampling represented 92% of the Adelaide Zoo flock, 100% of the Priam flock, and  
163 approximately 50% of the Healesville and Moonlit flocks. Faecal samples were collected  
164 concurrently from 35 birds at the Healesville Sanctuary. Eight captive-raised female birds  
165 released to the wild for the 2016-2017 breeding season were recaptured prior to migration  
166 and held in isolation over winter in captivity at Werribee Open Range Zoo (37°55'22.23"S,  
167 144°40'2.58"E). Cloacal swabs were collected from all eight birds.

168 An additional 38 cloacal swabs from adjacently housed parrots at the Adelaide Zoo  
169 were also tested. Species tested included: elegant parrot (*Neophema elegans*) (n=15);  
170 regent parrot (*Polytelis anthopeplus*) (n=4); black-capped lory (*Lorius lory*) (n=4); eclectus  
171 parrot (*Eclectus roratus*) (n=5); scarlet macaw (*Ara macao*) (n=2); crimson-bellied parakeet  
172 (*Pyrrhura perlata*) (n=6); blue-and-yellow macaw (*Ara ararauna*) (n=1) and yellow-crowned  
173 amazon (*Amazona ochrocephala*) (n=1).

174 DNA extraction, PCR amplification of adenovirus DNA, and sequencing were done as  
175 described above. To test the hypothesis that the amplification products were from PsAdv-2,  
176 PsAdv-2 specific primers (3'GAACAGAGAGGAGGAAGG, 5'GGGAAAACCGAAAAAGAGCA)  
177 were designed to amplify the second amplification products of the positive samples using  
178 Geneious (Biomatters, Auckland New Zealand). One positive sample from each tested

179 institution was randomly selected for sequencing with the PsAdv-2 specific internal primers  
180 (Australian Genome Research Facility, West Mead, Australia).

181

## 182 **Characterisation of suspected adenoviruses in the black-capped**

### 183 **lories**

184

185 The PCR amplification products of the cloacal swabs from 3 black-capped lorries were of the  
186 appropriate mass to be adenovirus. The attempt to sequence the amplicons with the  
187 degenerate amplification primers failed. To test the hypothesis that the amplification  
188 products were from PsADv-2, two additional PsAdv-2 specific primers were designed  
189 (3'ACAGAGAGGAGGAAGGCAGT, 5'TCACACACCCTTGGCCCTTT) using Geneious and  
190 amplification was attempted using amplicons from the first PCR reaction for the three lorries  
191 and amplicons from the orange-bellied parrots as positive controls.

192

### 193 **Sensitivity of the PCR assay**

194

195 To determine the sensitivity of the PCR assay, the first amplification products were purified.  
196 Then 10-fold serial dilutions of the purified product were made, starting from  $10^5$  copies/ $\mu$ L  
197 to 1 copy/ $\mu$ L. The dilutions were then amplified by the nested PCR assay.

198

### 199 **Data analysis**

200

201 Sex, age and reproductive data (n= 65 birds) for the 2016-17 breeding season of the birds  
202 were acquired from the breeding institutions. The age of birds was categorised as adult ( $\geq$   
203 1 yr) and juvenile (<1yr) groups. Significant tests for associations between the presence of  
204 the adenovirus infection and the age and sexes of the tested birds were based on Chi-  
205 squared test ( $p \leq 0.05$ ).

206 Linear regression modelling [42] was used to assess the correlations between the  
207 prevalence of adenovirus and indicators (fertility of eggs, egg hatchability, percentage of  
208 chicks that fledged) of reproductive success among four of five breeding collections  
209 (Healesville Sanctuary, Adelaide Zoo, Moonlit Sanctuary and Priam Parrot Breeding Centre).  
210 Goodness of fit was assessed by the  $R^2$  values. Statistical significance of the linear regression  
211 coefficients was assessed by the P-value from the *t-test*.

212

## 213 **Results**

214

### 215 **Investigation of mortality events at two captive breeding facilities**

216

#### 217 **Adelaide Zoo**

218

219 Birds were either found dead, or died after a short period of hospitalization, having been  
220 found weak, some with increased respiratory effort. The only consistent gross necropsy  
221 finding was thin body condition and birds were underweight, with empty gastrointestinal  
222 tracts. The first bird to die in February 2016 was diagnosed with systemic Gram-negative  
223 bacterial infection. Intra-nuclear inclusion bodies were observed in hepatocytes and were

224 associated with mild hepatocellular necrosis. Electron microscopy identified viral particles  
225 90-100nm in diameter that were morphologically consistent with an adenovirus. Four birds  
226 had mild non-specific histopathological changes and one bird had necrotizing Gram-negative  
227 sinusitis. Locally abundant intra-nuclear inclusions in renal epithelial cells of the collecting  
228 ducts associated with mild to moderate degenerative changes were found in two birds (Fig 1)  
229 that had severe aspergillosis; Both of the birds were positive for adenovirus DNA by PCR  
230 (Table 1). The mortality event was attributed to cumulative stressors in the flock, including a  
231 period of hot and unusually humid weather. Adenoviral lesions in these cases were  
232 considered secondary to immunosuppression in debilitated birds, and were not considered  
233 to have contributed significantly to the deaths of these birds.

234

235 **Fig 1. Intra-nuclear inclusion bodies in renal collecting duct epithelial cells in an orange-**  
236 **bellied parrot infected with psittacid adenovirus 2 (Arrows).**

237

### 238 **Taroona breeding facility**

239

240 The mortality event in Taroona was attributed to *Pseudomonas aeruginosa* septicaemia  
241 traced to contaminated sprouted seed [39]. Histopathology was available for five birds;  
242 intra-nuclear inclusions were found in kidney sections of three birds. Eight of the fifteen  
243 birds were PCR positive for PsAdv-2, with virus identified in kidney and/or liver. Two birds  
244 with renal inclusions tested PCR negative (pooled liver and spleen); one PCR-positive bird  
245 (liver) had no viral inclusions identified (Table 1).

246

## 247 Sequencing and PCR amplification with PsAdv-2 specific primers

248

249 The sequences (323bp) of the amplicons from the orange-bellied parrots at the Adelaide,  
250 Tarooma, breeding facilities were all identical to the sequence of PsAdv-2.

251

## 252 Detection of adenovirus DNA in cloacal swabs and droppings

253 Adenovirus infection was detected in all institutions, including the recaptured birds held at  
254 Werribee Zoo. The overall prevalence of the adenovirus infection was 42.7%, and the  
255 prevalence for each institution ranged from 29.7% to 76.5% (Table 2). The sequencing  
256 results of the DNA samples from each institution were all identical to PsAdv-2. All  
257 amplification products from positive orange-bellied parrots re-amplified with nested specific  
258 PsADV-2 primers. Three of four black-capped lorries were PCR-positive for adenovirus; the  
259 other 35 parrots at Adelaide Zoo were negative. The sequences of the amplification  
260 products from the black-capped lorries were not readable and amplification products were  
261 not generated using PsAdv-2 specific primers.

262 **Table 2. Detection of psittacid adenovirus 2 in cloacal swabs from orange-bellied parrot**  
263 **(*Neophema chrysogaster*) across five captive breeding institutions.**

|                                 | Healesville<br>Sanctuary | Adelaide Zoo | Moonlit<br>Sanctuary | Werribee Zoo | Priam<br>Breeding<br>Centre | Overall |
|---------------------------------|--------------------------|--------------|----------------------|--------------|-----------------------------|---------|
| <b>Adenovirus-<br/>Positive</b> | 11                       | 9            | 10                   | 4            | 13                          | 47      |
| <b>Total</b>                    | 37                       | 23           | 25                   | 8            | 17                          | 110     |
| <b>Prevalence</b>               | 29.7%                    | 39%          | 40%                  | 50%          | 76.5%                       | 42.7%   |

## 264 Relative sensitivity of sample sources and sensitivity of PCR assay

265

266 A comparison of PCR results for the paired faecal samples and cloacal swabs collected from  
267 35 orange-bellied parrots at Healesville Sanctuary is shown (Table 3). Seven birds were both  
268 positive on both samples; 25 birds were negative on both samples. Three birds were only  
269 positive for adenovirus in faeces.

270

271 **Table 3. Relative sensitivity of faeces and cloacal swabs for the detection of adenovirus**

272 **DNA in orange-bellied parrots (*Neophema chrysogaster*).**

| Adenovirus testing results | Number of individuals | Percentage % |
|----------------------------|-----------------------|--------------|
| Faeces +; Swabs +          | 7                     | 20.0%        |
| Faeces +; Swabs -          | 3                     | 8.6%         |
| Faeces -; Swabs -          | 25                    | 71.4%        |
| Faeces -; Swabs +          | 0                     | 0%           |
| <b>Total</b>               | <b>35</b>             | <b>100%</b>  |

273

274

## 275 Sensitivity of the nested PCR assay

276

277 All dilutions of DNA could be detected by the nested PCR indicating that it was able to  
278 detect a minimum of six copies of PsAdv-2.

279

## 280 **Correlation between infection prevalence and age, sex and** 281 **reproductive data**

282 The presence of PsAdv-2 was significantly associated with age, with adult birds more likely  
283 to be infected by PsAdv-2 than birds < 1 yr ( $\chi^2=8.38 > \chi_{0.05}^2 = 3.841$ ). There was no  
284 significant association between PsAdv-2 infection and sex ( $\chi^2=0.34 < \chi_{0.05}^2 = 3.841$ ). A  
285 quasi-significant negative correlation was observed between the fledgling rate of hatched  
286 chicks and the PsAdv-2 prevalence at the institutional level ( $R^2 = 0.890, p_\alpha = 0.057, p_\beta$   
287  $= 0.013$ ) (Fig 2). No significant association was observed between PsAdv-2 prevalence and  
288 fertility rate or hatch rate of fertile eggs.

289

290 **Fig 2. Linear regression model of the correlations between adenovirus prevalence and**  
291 **reproductive success of the orange-bellied parrots (*Neophema chrysogaster*) during the**  
292 **2016-17 breeding season. (H: Healesville Sanctuary, A: Adelaide Zoo, M: Moonlit**  
293 **Sanctuary, P: Priam Parrot Breeding Centre).**

294

## 295 **Discussion**

296 The orange-bellied parrot is on the verge of extinction in the wild. Efforts to maintain a wild  
297 population require the annual release of captive-raised birds [4]. Detailed protocols are in  
298 place, including the isolation of breeding stocks from other captive parrots, testing and  
299 quarantine, to minimise the impact of diseases in the captive breeding program and to  
300 prevent the introduction of disease from the captive-raised orange-bellied parrots to the  
301 wild orange-bellied parrots [43]. The identification of adenovirus inclusions in birds dying  
302 from a multifactorial disease at the Adelaide Zoo, and from *Pseudomonas areuginosa*

303 septicaemia at the Tarooma breeding facility prompted efforts to determine the specific  
304 adenovirus that was causing these lesions, determine how widespread infection was in the  
305 captive breeding stock, and if the wild birds had already been exposed.

306         Sequencing data generated in this study shows that the cause of the lesions in the  
307 Tarooma and Adelaide birds, and the adenovirus subclinically infecting other orange-bellied  
308 parrots, is the Siadenovirus PsAdv-2. This is the first record of this virus in Australia and the  
309 most comprehensive investigation into its epizootiology to date. PsAdv-2 was first detected  
310 in North America in a plum-headed parrot (*Psittacula cyanocephala*) that died with an acute  
311 systemic bacterial infection [21]. This bird also had adenovirus inclusions in the liver that  
312 were associated with a mild inflammatory response and individual hepatocyte necrosis.  
313 Wellehan et al. [21] also reported PsAdv-2 infection in an umbrella cockatoo (*Cacatua alba*)  
314 that died with a chronic encephalitis of unknown cause. Adenovirus inclusions were not  
315 seen in this bird and there was no evidence that PsAdv-2 contributed to its illness. The only  
316 other study of PsADV-2 involved a survey of 128 apparently healthy captive parrots in  
317 Slovenia [34]. In this study, cloacal swabs from 13 (10.2%) of the parrots were positive for  
318 PsADV-2 DNA. The positive species originated from South America, Africa, Southwest Asia,  
319 and Australia, including a *Neophema* sp. [34].

320         Based on the study in Europe [34] and our findings in orange-bellied parrots, PsAdv-2  
321 has a wide host range and is able to circulate in parrot populations without causing  
322 apparent disease, or doing so infrequently. While it will be challenging to determine the  
323 species of parrots from which this virus originated, it appears that its ability to cause  
324 subclinical infections in a wide range of parrot species has resulted in its global distribution  
325 [21, 34]. Finding virus in cloacal swabs and droppings suggests that faecal/urinary-oral  
326 transmission would be the most likely form of transmission. However, some adenoviruses



327 can be transmitted vertically [44], so it is possible that PsAdv-2 may also be transmitted this  
328 way.

329           Whether PsAdv-2 was introduced into the orange-bellied parrot population by  
330 indirect contact with other native or exotic species, or whether it originated in the orange-  
331 bellied parrot, is not known. All institutions housing orange-bellied parrot breeding  
332 populations, with the exception of the Taroom facility, have multiple other species of both  
333 native and exotic birds, and many of the enclosures are open to the environment and thus  
334 have the potential for wild bird exposure. We were only able to test parrot species in nearby  
335 enclosures at one institution and we found no evidence of infection to suggest they were  
336 the source of infection or that they had been infected with PsAdv-2 from the orange-bellied  
337 parrots. More extensive testing of other birds housed adjacent to the orange-bellied parrots  
338 at the other breeding institutions is warranted to further investigate potential transmission  
339 pathways.

340           Amplicons of the appropriate mass were detected in three of four black-capped  
341 lorries, but attempts to sequence these products were unsuccessful. These amplification  
342 products are not PsAdv-2 DNA as PsAv-2 specific primers did not produce an amplicon when  
343 used in a nested reaction with the first amplification product. Therefore, they may  
344 represent non-specific amplification products or the adenoviruses that infected the black-  
345 capped Lorries were not PsAdv-2. Cloning and sequencing the amplification products will be  
346 necessary to differentiate between these two possibilities.

347           While most PsAdv-2 infections appear to be subclinical, they may not be completely  
348 innocuous. The first report of this infection, in a plum-headed parrot [21], described a mild  
349 chronic hepatitis associated with inclusions and we saw a similar lesion in one of the orange-  
350 bellied parrots that died with aspergillosis in the Adelaide Zoo mortality cluster. Renal

351 inclusions were also seen in two other birds from the Adelaide Zoo and three of five birds  
352 for which there was histopathology that died from *Pseudomonas auregenosia* had renal  
353 inclusions. Virus inclusions in the kidneys varied between being uncommon to locally  
354 abundant and while generally not associated with necrosis nor a significant inflammatory  
355 response, degeneration of tubular epithelial cells was seen. This variation in lesions suggests  
356 that while adenovirus infection may persist in one or more organs in healthy birds, virus  
357 replication is triggered or increased in birds that are compromised by other infectious  
358 diseases and at these times it may have an impact on the host. Given that the  
359 immunosuppressive PBFDV is enzootic in the captive orange-bellied parrot breeding  
360 population [19], future studies correlating PsAdv-2 shedding with past and current PBFDV  
361 infection status would be warranted.

362         The reproductive success of the captive breeding program of orange-bellied parrots  
363 is relatively poor with problems including infertile eggs and suboptimal chick survival after  
364 hatch [5]. This may reflect a lack of genetic diversity in the overall population, challenges  
365 associated with breeding orange-bellied parrots outside of their normal summer range,  
366 malnutrition and/or other unrecognized factors. In this paper, we present preliminary data  
367 suggesting a correlation between adenovirus shedding prevalence with in a breeding facility  
368 and chick survival. Additional studies correlating the infection status of the parents with  
369 chick infection status and survival will be required before the impact of PsAdv-2 on chick  
370 mortality can be determined. Testing dead, in shell, embryos and infertile eggs for the  
371 presence of PsAdv-2 would also prove useful, as it could be used to determine if egg  
372 transmission occurs and if egg infection impacts embryo survival. If egg transmission does  
373 occur, it would make eradication of the virus from the orange-bellied parrots challenging or  
374 even impossible.

375 A Veterinary Technical Reference Group containing members from all the  
376 institutions involved in the orange-bellied parrot captive breeding program has been  
377 established to provide advice to the Orange-bellied Parrot Recovery Team. The value of this  
378 Reference Group was demonstrated in their response to the initial detection of an  
379 adenovirus in the captive orange-bellied parrots. The Reference Group was instrumental in  
380 making samples available for the adenovirus testing done in this study. Additionally, the  
381 Reference Group agreed prior to testing that if an adenovirus was found to be present in all  
382 institutions and wild birds had been exposed, then it would be considered to be endemic in  
383 both the captive and wild populations and no control efforts would be undertaken. Our  
384 findings show that PsAdv-2 is indeed endemic in the captive orange-bellied parrot  
385 population and that the wild population has been exposed. Our findings of an overall  
386 prevalence of 42.7% infection in the tested birds also make any type of control option  
387 virtually impossible. Isolation of nearly half of the birds and taking this number of captive  
388 birds out of the breeding population would not be practical and likely would result in a loss  
389 of genetically important breeding stock. Also, the sensitivity of PCR testing of cloacal swabs  
390 or droppings to detect infected birds is unknown. It is possible that infected birds shed virus  
391 intermittently or may not shed virus at all. We also found that virus shedding was more  
392 common in adult birds than birds less than one year. This may mean, as occurs in  
393 adenovirus infections in poultry, that although birds are infected with an adenovirus,  
394 shedding is more likely to occur in sexually mature birds (McFerran and Smyth, 2000). If any  
395 of these hypotheses are correct, the prevalence of infected birds may be much higher than  
396 the results of this study have documented. Repeated testing of birds over time, and  
397 opportunistic parallel testing of cloacal swabs/droppings and tissues at necropsy, will be  
398 necessary if the sensitivity of this test is to be determined.

399           This study generated additional results of potential diagnostic significance. While  
400 both cloacal swabs and droppings were found to be useful samples for detecting PsAdv-2  
401 infection in the orange-bellied parrot, in the 35 samples where both cloacal swabs and  
402 droppings were submitted, 20% of the cloacal swabs were positive, while 28.7% of the  
403 droppings were positive. This suggests that droppings may be the preferred sample to test  
404 when screening for PsAdv-2 infection, eliminating the need to catch a bird to test it.  
405 Additional diagnostic findings show that both the liver and the kidney can contain PsAdv-2  
406 DNA without the presence of inclusion bodies in histological sections. Also, PsAdv-2 DNA  
407 can be found in some, but not all, liver samples, from birds with renal inclusions, making  
408 kidney the organ of choice when testing cadavers for the presence of PsAdv-2.

409           It has been proposed that private aviculturists might be used to assist in breeding  
410 the orange-bellied parrot to increase the numbers in captivity and the availability of birds  
411 for release into the wild. The findings of this study argue against this proposal. Given the  
412 uncertainty of the sensitivity of testing for PsAdv-2, it would be impossible to guarantee that  
413 birds sent to aviculture collections would be free of this virus and therefore could pose a risk  
414 to the aviculturists' birds. Likewise, while extensive testing is done yearly for the PBFDV in  
415 the captive orange-bellied parrot population [19], it has been impossible to eradicate it and  
416 so these birds remain potential sources of this virus. Introduction of new infectious diseases  
417 into the captive orange-bellied parrot population in aviculturists' collections is also a risk.  
418 Most aviculturists have limited resources and it would be unlikely that they could provide  
419 housing and management practices that would prevent disease transmission from their own  
420 birds to the orange-bellied parrots. This is of great concern in that Avian Bornavirus-2 and 4  
421 and Psittacid Herpesvirus-3, pathogens that have had major impacts on avicultural species  
422 globally, are known to be present in some Australian avicultural collections [45, 46]. Also,

423 new viruses are still being discovered in Australian aviculture collections and the  
424 epizootiology of these viruses and means of testing for them are largely unknown [24, 47].

425 In conclusion, this study documents the presence of PsAdv-2 in Australia for the first  
426 time. It also shows that it is endemic in the captive orange-bellied parrot population and  
427 that the wild population has been exposed. PsAdv-2 does not appear to be highly  
428 pathogenic to the orange-bellied parrot, but reactivation of replication may occur in birds  
429 that are experiencing other stressors or concurrent infections. Preliminary findings hint that  
430 PsAdv-2 may impact chick survival to fledging, but a more detailed investigation will be  
431 required to confirm this. Because PsAdv-2 is endemic in the orange-bellied parrot  
432 population, its impact on the population is minimal or unproven, and the sensitivity of  
433 available testing methods is not known, efforts to control this virus in this population are  
434 unlikely to be successful and are not recommended at this time.

435

## 436 **Acknowledgements**

437

438 This research was funded by the Sydney School of Veterinary Sciences, The University of  
439 Sydney. The authors are grateful to the staff of Adelaide Zoo, Taroom Orange-bellied Parrot  
440 Breeding Facility, Healesville Sanctuary, Moonlit Sanctuary, Priam Parrot Breeding Centre  
441 and the Werribee Open Range Zoo who collected samples for this study. The authors thank  
442 Annika Everaardt, Lisa Tuthill, Leanne Wicker, and Daniel Gowland for their support and  
443 providing samples.

444

## 445 **References**

446

447 1. BirdLife International 2016. *Neophema chrysogaster*. The IUCN Red List of

448 Threatened Species 2016: e.T22685203A93063235. Available at:

449 <http://dx.doi.org/10.2305/IUCN.UK.2016-3.RLTS.T22685203A93063235.en>.

450 2. Jarman H. The orange-breasted parrot (*Neophema chrysogaster*). Australian Field

451 Ornithology. 2016;2(6): 155-167.

452 3. Menkhorst P, Loyn R, Brown P. Management of the orange-bellied parrot. In TW

453 Clark TW, Seebeck JH, editors. Management and conservation of small populations. Chicago,

454 Chicago Zoological Society; 1990. pp. 239-52.

455 4. Troy S. Tasmanian Orange-bellied Parrot Program: Report on the Tasmanian Wild

456 Population 2016/17. In Natural and Cultural Heritage Division, editor: DPIPWE; 2017.

457 5. Stojanovic D, Alves F, Cook H, Crates R, Heinsohn R, Peters A, et al. Further

458 knowledge and urgent action required to save orange-bellied parrots from extinction. Emu-

459 Aus Ornithol. 2017;118(1): 1-9.

460 6. Smales I, Brown P, Menkhorst P, Holdsworth M, Holz P. Contribution of captive

461 management of orange-bellied parrots *Neophema chrysogaster* to the recovery programme

462 for the species in Australia. Int Zoo Yb. 2000;37(1): 171–178.

463 7. Zippel K, Johnson K, Gagliardo R, Gibson R, McFadden R, Browne R, et al. The

464 amphibian ark: A global community for *ex situ* conservation of amphibians. Herpetol

465 Conserv Biol. 2011;6(3): 340–352.

466 8. VanderWerf E, Crampton LH, Diegmann J, Atkinson CT, Leonard DL. Survival

467 estimates of wild and captive-bred released Puaiohi, an endangered Hawaiian thrush. Condor.

468 2014;116(4): 609-618.

- 469 9. Howard JG, Lync C, Santymire RM, Marinari PE, Wildt DE. Recovery of gene  
470 diversity using long-term cryopreserved spermatozoa and artificial insemination in the  
471 endangered black-footed ferret. *Anim Conserv.* 2016;19(2): 102–111.
- 472 10. Hammer S, Watson R. The challenge of managing Spix Macaws (*Cyanopsitta spixii*)  
473 at Qatar-an eleven-year retrospection. *Zool Gart.* 2012;81(2): 81-95.
- 474 11. Regnard GL, Boyes RS, Martin RO, Hitzeroth II, Rybicki EP. Beak and feather  
475 disease viruses circulating in Cape parrots (*Poicephalus robustus*) in South Africa. *Arch*  
476 *Virol.* 2015;160(1): 47-54.
- 477 12. Meli ML, Cattori V, Martínez F, López G, Vargas A, Simón MA, et al. Feline  
478 leukemia virus and other pathogens as important threats to the survival of the critically  
479 endangered Iberian lynx (*Lynx pardinus*). *PLoS One.* 2009;4(3): e4744.
- 480 13. Seimon TA, Miquelle DG, Chang TY, Newton AL, Korotkova I, Ivanchuk G, et al.  
481 Canine distemper virus: an emerging disease in wild endangered Amur tigers (*Panthera tigris*  
482 *altaica*). *M Bio.* 2013;4(4): e00410-13.
- 483 14. Walker SF, Bosch J, James TY, Litvintseva AP, Valls JAO, Piña S, et al. Invasive  
484 pathogens threaten species recovery programs. *Curr Biol.* 2008;18(18): R853-R854.
- 485 15. Fenner J, Seltzer J, Peyton S, Sullivan H, Tolson P, Walsh RP, et al. Demographic  
486 variation of Wolbachia infection in the endangered Mitchell's Satyr Butterfly. *Insects.*  
487 2017;8(2): 50-57.
- 488 16. Peniche G, Olson PD, Bennett DJ, Wong L, Sainsbury AW, Durrant C. 2017.  
489 Protecting free-living dormice: Molecular identification of cestode parasites in captive  
490 dormice (*Muscardinus avellanarius*) destined for reintroduction. *EcoHealth* 2017;14: S106–  
491 S116.

- 492 17. Fogell DJ, Martin RO, Groombridge JJ. Beak and feather disease virus in wild and  
493 captive parrots: an analysis of geographic and taxonomic distribution and methodological  
494 trends. *Arch Virol.* 2016;161(8): 2059-2074.
- 495 18. Kundu S, Faulkes CG, Greenwood AG, Jones CG, Kaiser P, Lyne OD, et al. Tracking  
496 viral evolution during a disease outbreak: the rapid and complete selective sweep of a  
497 circovirus in the endangered Echo parakeet. *J Virol.* 2012;86(9): 5221-5229.
- 498 19. Peters A, Patterson EI, Baker BG, Holdsworth M, Sarker S, Ghorashi SA, et al.  
499 Evidence of psittacine beak and feather disease virus spillover into wild critically endangered  
500 orange-bellied parrots (*Neophema chrysogaster*). *J Wildl Dis.* 2014;50(2): 288-296.
- 501 20. Wellehan JF, Johnson AJ, Latimer KS, Bischoff K, Lafortune M, Jacobson ER.  
502 Identification and initial characterization of an adenovirus associated with fatal hepatic and  
503 lymphoid necrosis in a Meyer's parrot (*Poicephalus meyeri*). *J Avian Med Surg.* 2005;19(3):  
504 191-197.
- 505 21. Wellehan JF Jr, Greenacre CB, Fleming GJ, Stetter MD, Childress AL, Terrell SP.  
506 Siadenovirus infection in two psittacine bird species. *Avian Pathol.* 2009;38(5): 413-417.
- 507 22. To KK, Tse H, Chan WM, Choi GK, Zhang AJ, Sridhar S, et al. A novel psittacine  
508 adenovirus identified during an outbreak of avian chlamydiosis and human psittacosis:  
509 zoonosis associated with virus-bacterium coinfection in birds. *PLoS Negl Trop Dis.*  
510 2014;8(12): e3318.
- 511 23. Hulbert CL, Chamings A, Hewson KA, Steer PA, Gosbell M, Noormohammadi AH.  
512 Survey of captive parrot populations around Port Phillip Bay, Victoria, Australia, for  
513 psittacine beak and feather disease virus, avian polyomavirus and psittacine adenovirus. *Aust*  
514 *Vet J.* 2015;93(8): 287-92.



- 515 24. Das S, Fearnside K, Sarker S, Forwood JK, Raidal SR. A novel pathogenic  
516 aviadenovirus from red-bellied parrots (*Poicephalus rufiventris*) unveils deep recombination  
517 events among avian host lineages. *Viol.* 2017;502: 188-197.
- 518 25. Pass DA. Inclusion bodies and hepatopathies in psittacines. *Avian Pathol.* 1987;16(4):  
519 581-597.
- 520 26. Desmidt M, Ducatelle R, Uyttebroek E, Charlier G, Hoorens J. Respiratory  
521 adenovirus-like infection in a rose-ringed parakeet (*Psittacula krameri*). *Avian Dis.* 1991;  
522 35(4):1001-1006.
- 523 27. Droual R, Woolcock P, Nordhausen R, Fitzgerald S. Inclusion body hepatitis and  
524 hemorrhagic enteritis in two African grey parrots (*Psittacus erithacus*) associated with  
525 adenovirus. *J Vet Diagn Invest.* 1995;7(1): 150-154.
- 526 28. Mfenyana N. The isolation and characterisation of a Psittacine Adenovirus from  
527 infected parrots in South Africa. BSc HonsThesis. University of the Free State; 2007.  
528 Available from:  
529 [https://www.researchgate.net/publication/265191217\\_The\\_isolation\\_and\\_characterisation\\_of](https://www.researchgate.net/publication/265191217_The_isolation_and_characterisation_of_a_Psittacine_Adenovirus_from_infected_parrots_in_South_Africa?enrichId=rgreq-c1eb98e63bee71e09a9957f0fa34f440-XXX&enrichSource=Y292ZXJQYWdlOzI2NTE5MTIxNztBUzoyOTkyMzMzMTcwMTU1NTJAMTQ0ODM1NDE5MDk5MA%3D%3D&el=1_x_2&_esc=publicationCoverPdf)  
530 [\\_a\\_Psittacine\\_Adenovirus\\_from\\_infected\\_parrots\\_in\\_South\\_Africa?enrichId=rgreq-](https://www.researchgate.net/publication/265191217_The_isolation_and_characterisation_of_a_Psittacine_Adenovirus_from_infected_parrots_in_South_Africa?enrichId=rgreq-c1eb98e63bee71e09a9957f0fa34f440-XXX&enrichSource=Y292ZXJQYWdlOzI2NTE5MTIxNztBUzoyOTkyMzMzMTcwMTU1NTJAMTQ0ODM1NDE5MDk5MA%3D%3D&el=1_x_2&_esc=publicationCoverPdf)  
531 [c1eb98e63bee71e09a9957f0fa34f440-](https://www.researchgate.net/publication/265191217_The_isolation_and_characterisation_of_a_Psittacine_Adenovirus_from_infected_parrots_in_South_Africa?enrichId=rgreq-c1eb98e63bee71e09a9957f0fa34f440-XXX&enrichSource=Y292ZXJQYWdlOzI2NTE5MTIxNztBUzoyOTkyMzMzMTcwMTU1NTJAMTQ0ODM1NDE5MDk5MA%3D%3D&el=1_x_2&_esc=publicationCoverPdf)  
532 [XXX&enrichSource=Y292ZXJQYWdlOzI2NTE5MTIxNztBUzoyOTkyMzMzMTcwMTU1](https://www.researchgate.net/publication/265191217_The_isolation_and_characterisation_of_a_Psittacine_Adenovirus_from_infected_parrots_in_South_Africa?enrichId=rgreq-c1eb98e63bee71e09a9957f0fa34f440-XXX&enrichSource=Y292ZXJQYWdlOzI2NTE5MTIxNztBUzoyOTkyMzMzMTcwMTU1NTJAMTQ0ODM1NDE5MDk5MA%3D%3D&el=1_x_2&_esc=publicationCoverPdf)  
533 [NTJAMTQ0ODM1NDE5MDk5MA%3D%3D&el=1\\_x\\_2&\\_esc=publicationCoverPdf](https://www.researchgate.net/publication/265191217_The_isolation_and_characterisation_of_a_Psittacine_Adenovirus_from_infected_parrots_in_South_Africa?enrichId=rgreq-c1eb98e63bee71e09a9957f0fa34f440-XXX&enrichSource=Y292ZXJQYWdlOzI2NTE5MTIxNztBUzoyOTkyMzMzMTcwMTU1NTJAMTQ0ODM1NDE5MDk5MA%3D%3D&el=1_x_2&_esc=publicationCoverPdf)
- 534 29. Lüschow D, Prusas C, Lierz M, Gerlach H, Soike D, Hafez HM. Adenovirus of  
535 psittacine birds: investigations on isolation and development of a real-time polymerase chain  
536 reaction for specific detection. *Avian Pathol.* 2007;36(6): 487-494.
- 537 30. Scott P, Condrón R, Reece R. Inclusion body hepatitis associated with adenovirus-  
538 like particles in a cockatiel (*Psittaciformes; Nymphicus hollandicus*). *Aust Vet J.*  
539 1986;63(10):337-8.

- 540 31. Mori F, Touchi A, Suwa T, Itakura C, Hashimoto A, Hirai K. Inclusion bodies  
541 containing adenovirus-like particles in the kidneys of psittacine birds. *Avian Pathol.*  
542 1989;18(1): 197-202.
- 543 32. Gomez-Villamandos JC, Mozos E, Sierra MA, Perez J, Mendez A. Inclusion bodies  
544 containing adenovirus-like particles in the intestine of a psittacine bird affected by inclusion  
545 body hepatitis. *J Wildl Dis.* 1992;28(2): 319-22.
- 546 33. Raue R, Gerlach H, Muller H. Phylogenetic analysis of the hexon loop 1 region of an  
547 adenovirus from psittacine birds supports the existence of a new psittacine adenovirus  
548 (PsAdV). *Arch Virol.* 2005;150(10): 1933-1943.
- 549 34. Zadavec M, Račnik J, Slavec B, Ballmann M, Marhold C, Harrach B, et al. (2011).  
550 Detection of new adenoviruses in psittacine birds in Slovenia. IX Simpozij Peradarski dani  
551 2011 S međunarodnim sudjelovanjem, Sibenik, Croatia p.131-134.
- 552 35. Hess M. Aviadenovirus infections. In; Swayne DE, Glisson JR, McDougald LR,  
553 Nolan LK, Suarez DL, Nair VL, editors. *Diseases of Poultry*, 13th ed. Ames; Wiley-  
554 Blackwell: 2013. pp. 290-300.
- 555 36. Ramis A, Marlasca MJ, Majo N, Ferrer L. Inclusion body hepatitis (IBH) in a group  
556 of eclectus parrots (*Eclectus roratus*). *Avian Pathol.* 1992;21(1): 165-169.
- 557 37. Toro H, Gonzalez C, Cerda L, Hess M, Reyes E, Geisse C. Chicken anemia virus and  
558 fowl adenoviruses: association to induce the inclusion body hepatitis/hydropericardium  
559 syndrome. *Avian Dis.* 2000;44(1): 51-58.
- 560 38. Eregae ME, Dewey CE, McEwen SA, Ouckama R, Ojkić D, Guerin MT. Flock  
561 prevalence of exposure to avian adeno-associated virus, chicken anemia virus, fowl  
562 adenovirus, and infectious bursal disease virus among Ontario broiler chicken flocks. *Avian*  
563 *Dis.* 2013;58(1): 71-77.

- 564 39. Clarke J, Peck S, Davis A, Knowles G, Taylor J, Delaine J, et al. Outbreak of  
565 *Pseudomonas aeruginosa* at the Taroona Orange Bellied Parrot Breeding Facility in January  
566 2017: diagnosis, sources and lessons learnt. Wildl Dis Assoc Australasian Section Conf 2017;  
567 Falls Creek, Victoria, Australia.
- 568 40. Wellehan JF, Johnson AJ, Harrach B, Benkő M, Pessier AP, Johnson CM, et al.  
569 Detection and analysis of six lizard adenoviruses by consensus primer PCR provides further  
570 evidence of a reptilian origin for the adenoviruses. J Virol. 2004;78(23): 13366-13369.
- 571 41. Boratyn GM, Schäffer AA, Agarwala R, Altschul SF, Lipman DJ, Madden TL.  
572 Domain enhanced lookup time accelerated BLAST. Biol Direct. 2012;7(1): 12-25.
- 573 42. Schneider A, Hommel G, Blettner M. Linear regression analysis: part 14 of a series  
574 on evaluation of scientific publications. Dtsch Arztebl Int. 2010;107(44): 776-782.
- 575 43. Orange-bellied Parrot Recovery Team. National recovery plan for the orange-bellied  
576 parrot (*Neophema chrysogaster*), Department of Primary Industries and Water. 2006.  
577 Available at: [http://www.environment.gov.au/system/files/resources/f6680c43-4b28-4a4a-  
578 86c1-04adaad26f28/files/national-recovery-plan-orange-bellied-parrot.pdf](http://www.environment.gov.au/system/files/resources/f6680c43-4b28-4a4a-86c1-04adaad26f28/files/national-recovery-plan-orange-bellied-parrot.pdf)
- 579 44. Grafl B, Aigner F, Liebhart D, Marek A, Prokofieva I, Bachmeier J, et al. Vertical  
580 transmission and clinical signs in broiler breeders and broilers experiencing adenoviral  
581 gizzard erosion. Avian Path. 2012;41(6): 599-604.
- 582 45. Weissenböck H, Bakonyi T, Sekulin K, Ehrensperger F, Doneley RJ, Dürrwald R, et  
583 al. Avian bornaviruses in psittacine birds from Europe and Australia with proventricular  
584 dilatation disease. Emerg Inf Dis. 2009;15(9): 1453.
- 585 46. Gabor M, Gabor L, Peacock L, Srivastava M, Rosenwax A, Phalen D. Psittacid  
586 herpesvirus 3 infection in the eclectus parrot (*Eclectus roratus*) in Australia. Vet Path.  
587 2013;50(6): 1053-7.

588 47. Sutherland M, Sarker S. Genomic characterisation of the Psittacid herpesvirus from  
589 Indian ringnecks (*Psittacula krameri*). Annual Conference Proceedings Association of Avian  
590 Veterinarians Australasian Committee 2017 Conference, Auckland, New Zealand. 2017: 16-  
591 19.  
592  
593  
594  
595

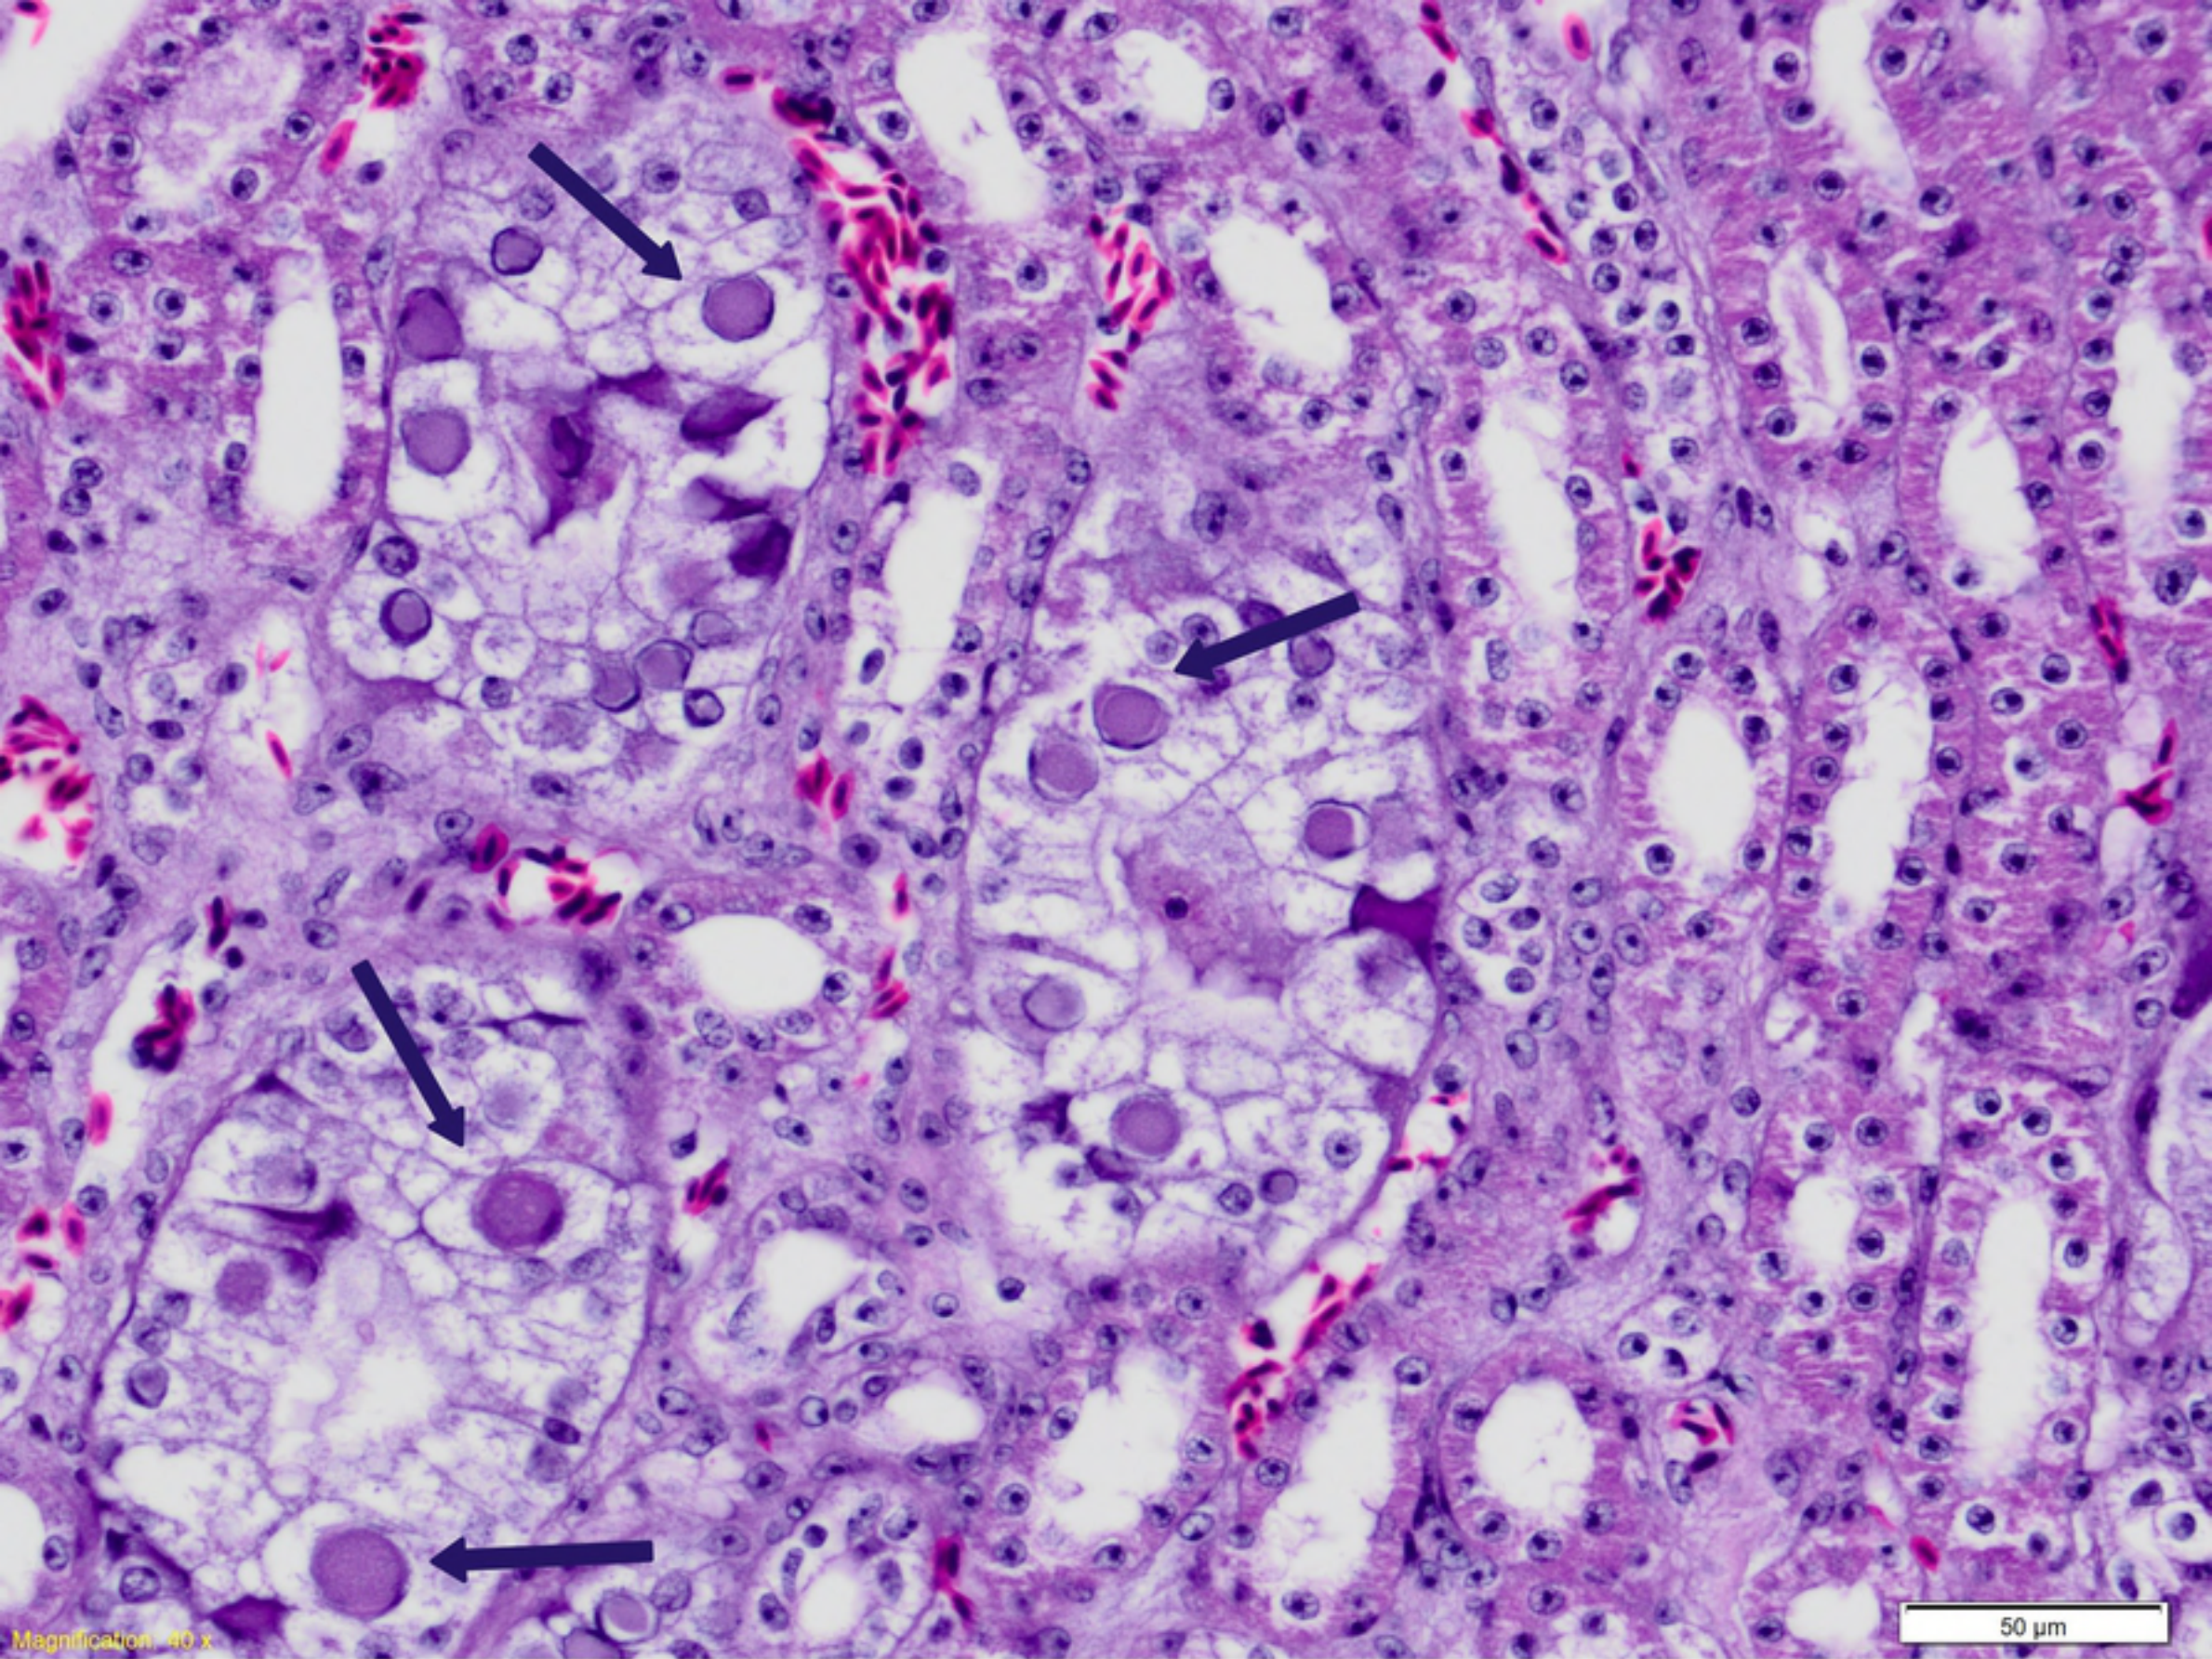

Figure 1

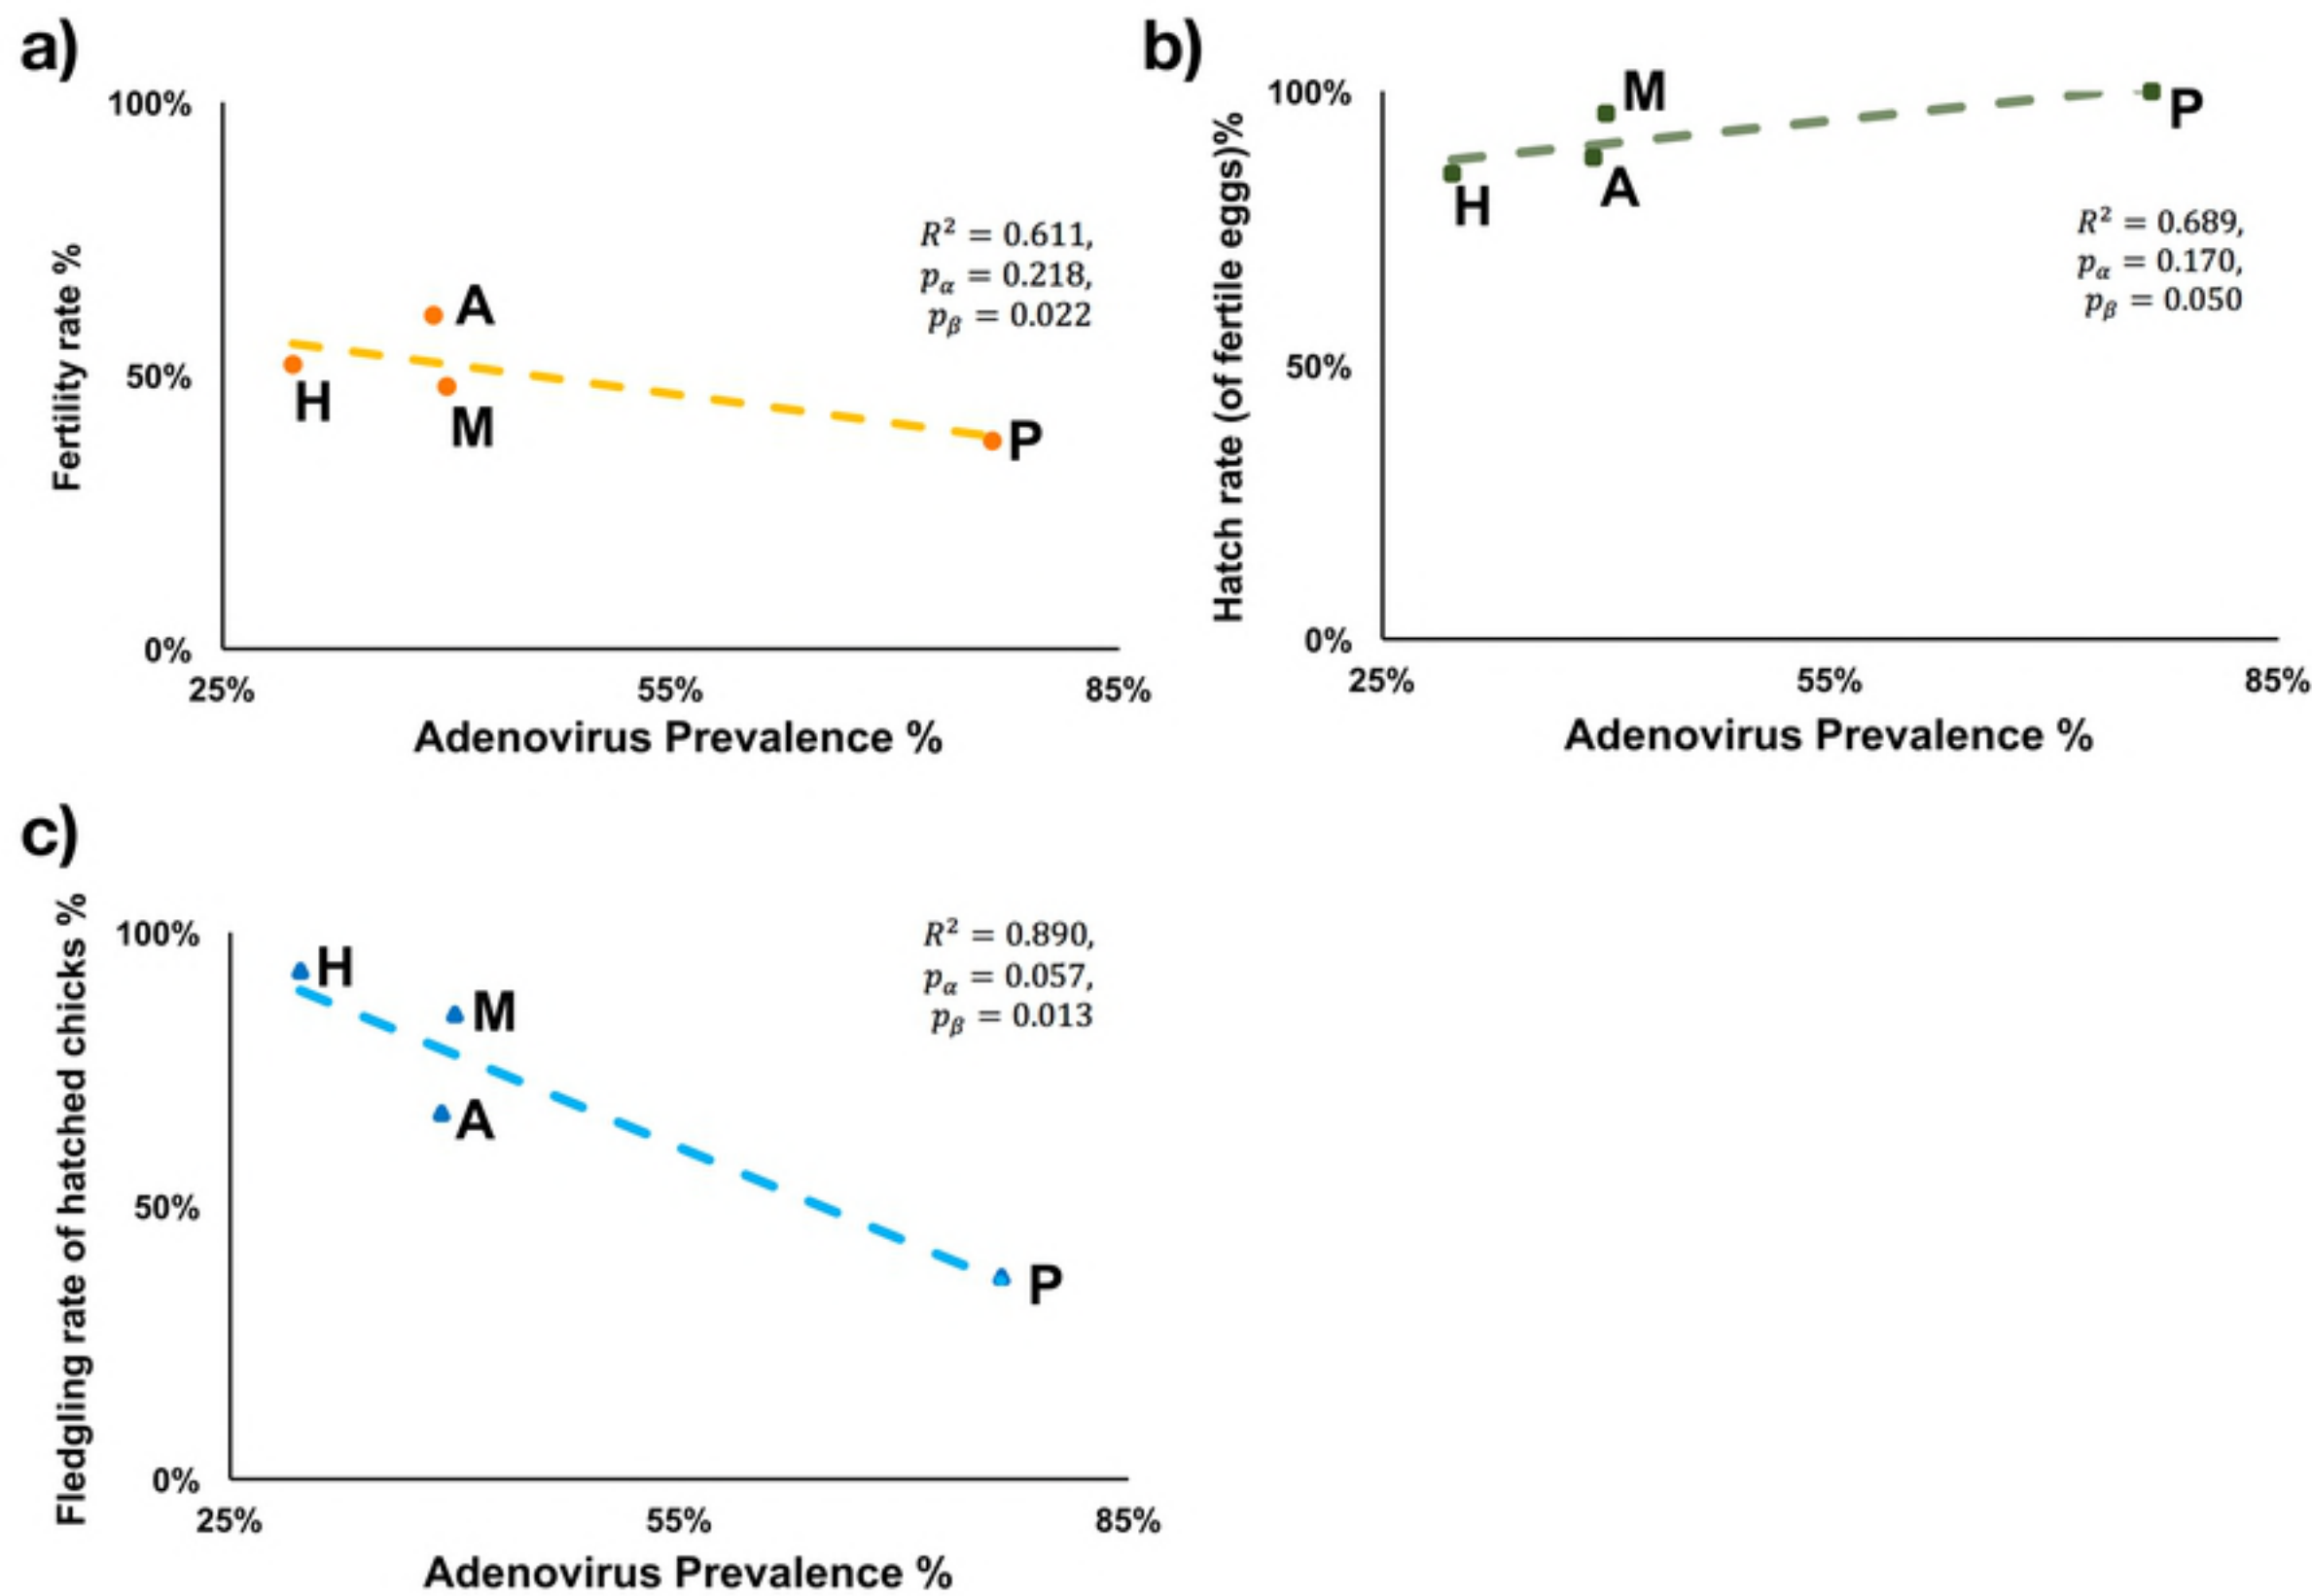

Figure 2
